# Supplementary material for: Evidence that Natural Selection on Codon Usage in Drosophila pseudoobscura Varies Across Codons
Source: PubMed Central journal article supplement (PMC4059240; doi:10.1534/g3.114.010488), 2014-02-13
Supplement: supp_g3.114.010488_Corrigendum_Kliman.pdf [file supp_g3.114.010488_Corrigendum_Kliman.pdf]

Corrigendum for Kliman, *G3* 4 (4) 681-692.

*G3*, Vol 4, 681-692, April 2014, Copyright © 2014 Genetics Society of America.

#### CORRIGENDUM

In the article by R. M. Kliman (*G3* 4: 681-692) entitled "Evidence that Natural Selection on Codon Usage in *Drosophila pseudoobscura* Varies Across Codons", Figure 5 parts C and D have been modified to correct an error in transcribing values during the production of the figure. None of the analyses were affected.
